# Supplementary material
Source: HighWire-hosted journal article supplement (https://thorax.bmj.com/content/76/3/302)
Supplement: inline-supplementary-material-2 [file inline-supplementary-material-2.pdf]

**Appendix 2 – Quality appraisal**

| Guideline                                                                       | 1: Scope and purpose (%) | 2: Stakeholder involvement (%) | 3: Rigour of development (%) | 4: Clarity of presentation (%) | 5: Applicability (%) | 6: Editorial independence (%) | Appraiser agreement (%) |
|---------------------------------------------------------------------------------|--------------------------|--------------------------------|------------------------------|--------------------------------|----------------------|-------------------------------|-------------------------|
| Kansas, USA – Kansas Department for Health and Environment                      | 86                       | 58                             | 9                            | 69                             | 21                   | 8                             | 70                      |
| Italy – Italian Society of Anaesthesia Analgesia and Intensive Care (SIAARTI)   | 75                       | 33                             | 2                            | 61                             | 4                    | 8                             | 83                      |
| Australia & New Zealand – The Australian and New Zealand Intensive Care Society | 78                       | 33                             | 13                           | 58                             | 8                    | 8                             | 74                      |
| Belgium – Belgian Society of Intensive Care Medicine                            | 61                       | 25                             | 4                            | 47                             | 2                    | 8                             | 83                      |
| USA – United States Department of Defense                                       | 67                       | 31                             | 4                            | 31                             | 2                    | 8                             | 65                      |
| Switzerland – Swiss Academy of Medical Sciences                                 | 83                       | 42                             | 23                           | 67                             | 10                   | 4                             | 70                      |
| UK – National Institute for Health and Care Excellence (NICE)                   | 67                       | 22                             | 14                           | 36                             | 8                    | 17                            | 65                      |
| Sri Lanka – Ministry of Health Sri Lanka                                        | 78                       | 47                             | 8                            | 58                             | 4                    | 8                             | 70                      |
| Global – Extracorporeal Life Support Organization                               | 89                       | 25                             | 14                           | 64                             | 21                   | 8                             | 70                      |
| Score median and inter-quartile range                                           | 78 (67-83)               | 33 (25-42)                     | 9 (4-14)                     | 58 (47-64)                     | 8 (4-10)             | 8 (8-8)                       |                         |

Supplementary Table 1 (as referred to in the results section of the paper): AGREE II Quality Appraisal – Score percentages are presented for each of the six quality assessment domains. The last column presents the percentage agreement between the two appraisers across all six domains for each guideline. Agreement was defined as appraisers providing the same item score or a one point difference between item scores. Median and inter-quartile range percentages for the nine guidelines are presented for each of the six quality assessment domains.

| Guideline                                                                       | 1: Clinical applicability (%) | 2: Values and preferences (%) | 3: Implementability (%) |
|---------------------------------------------------------------------------------|-------------------------------|-------------------------------|-------------------------|
| Kansas, USA – Kansas Department for Health and Environment                      | 39                            | 38                            | 42                      |
| Italy – Italian Society of Anaesthesia Analgesia and Intensive Care (SIAARTI)   | 28                            | 38                            | 33                      |
| Australia & New Zealand – The Australian and New Zealand Intensive Care Society | 33                            | 21                            | 17                      |
| Belgium – Belgian Society of Intensive Care Medicine                            | 28                            | 25                            | 25                      |
| USA – United States Department of Defense                                       | 28                            | 13                            | 25                      |
| Switzerland – Swiss Academy of Medical Sciences                                 | 50                            | 50                            | 33                      |
| UK – National Institute for Health and Care Excellence (NICE)                   | 28                            | 17                            | 25                      |
| Sri Lanka – Ministry of Health Sri Lanka                                        | 17                            | 8                             | 17                      |
| Global – Extracorporeal Life Support Organization                               | 56                            | 25                            | 42                      |
| Score median and inter-quartile range                                           | 28 (28-39)                    | 25 (17-38)                    | 25 (25-33)              |

Supplementary Table 2 (as referred to in the results section of the paper): AGREE REX Quality Appraisal - Score percentages are presented for each of the three quality assessment domains. Median and inter-quartile range percentages for the nine guidelines are presented for each of the three quality assessment domains.
